# Supplementary material for: EDDA 2.0: integrated simulation of debris flow initiation and dynamics, considering two initiation mechanisms
Source: Copernicus journal article supplement (doi:10.5194/gmd-2017-204), 2017-11-16
Supplement: Supplementary file 1 [file New Microsoft Excel Worksheet.xlsx]

## Sheet: Sheet2
tsave	0		depth
	-180.235		100
	-175.531		95
	-170.814		90
	-166.083		85
	-161.34		80
	-156.585		75
	-151.819		70
	-147.042		65
	-142.254		60
	-137.457		55
	-132.65		50
	-127.834		45
	-123.009		40
	-118.176		35
	-113.335		30
	-108.487		25
	-103.631		20
	-98.7688		15
	-93.8998		10
	-89.0246		5
	-84.1435		0
	-84.1435		0
	-80.2813		-5
	-76.3757		-10
	-72.428		-15
	-68.4393		-20
	-64.411		-25
	-60.344		-30
	-56.2398		-35
	-52.0993		-40
	-47.9238		-45
	-43.7145		-50
	-39.4725		-55
	-35.1989		-60
	-30.8948		-65
	-26.5612		-70
	-22.1993		-75
	-17.8101		-80
	-13.3946		-85
	-8.95378		-90
	-4.4886		-95
	0		-100
tsave	1
	-157.618
	-154.834
	-151.915
	-148.861
	-145.674
	-142.354
	-138.904
	-135.327
	-131.624
	-127.801
	-123.861
	-119.809
	-115.649
	-111.387
	-107.027
	-102.574
	-98.0344
	-93.4122
	-88.7126
	-83.9402
	-79.0998
	-79.0998
	-76.8732
	-74.1315
	-70.9866
	-67.5357
	-63.8575
	-60.0129
	-56.0461
	-51.9887
	-47.8622
	-43.6811
	-39.4549
	-35.19
	-30.8905
	-26.5593
	-22.1986
	-17.81
	-13.3947
	-8.95394
	-4.48871
	0
tsave	2
	-150.626
	-147.699
	-144.659
	-141.507
	-138.243
	-134.869
	-131.385
	-127.794
	-124.097
	-120.297
	-116.396
	-112.396
	-108.302
	-104.115
	-99.8403
	-95.4797
	-91.0371
	-86.5162
	-81.9205
	-77.2535
	-72.519
	-72.519
	-71.2841
	-69.5256
	-67.2973
	-64.6584
	-61.6691
	-58.3871
	-54.8648
	-51.1482
	-47.2761
	-43.2801
	-39.1856
	-35.0123
	-30.7754
	-26.4861
	-22.1529
	-17.7821
	-13.3782
	-8.9449
	-4.48476
	0
tsave	5
	-136.28
	-133.089
	-129.808
	-126.437
	-122.977
	-119.429
	-115.794
	-112.075
	-108.273
	-104.39
	-100.428
	-96.3884
	-92.2741
	-88.0872
	-83.83
	-79.5048
	-75.1142
	-70.6605
	-66.1463
	-61.5739
	-56.9459
	-56.9459
	-56.7208
	-56.12
	-55.1462
	-53.8078
	-52.1186
	-50.0965
	-47.7631
	-45.1422
	-42.2592
	-39.1402
	-35.8109
	-32.2963
	-28.62
	-24.8041
	-20.869
	-16.8334
	-12.7141
	-8.52636
	-4.28411
	0
tsave	10
	-120.6
	-117.163
	-113.651
	-110.065
	-106.406
	-102.677
	-98.8773
	-95.01
	-91.0763
	-87.0778
	-83.0164
	-78.8938
	-74.712
	-70.4726
	-66.1777
	-61.8291
	-57.4288
	-52.9785
	-48.4803
	-43.9359
	-39.3473
	-39.3473
	-39.4983
	-39.4099
	-39.0747
	-38.4878
	-37.647
	-36.5528
	-35.2082
	-33.619
	-31.7933
	-29.7414
	-27.4754
	-25.009
	-22.3574
	-19.5365
	-16.5629
	-13.4536
	-10.2258
	-6.89641
	-3.48235
	0
tsave	15
	-109.731
	-106.145
	-102.492
	-98.7747
	-94.9942
	-91.1519
	-87.2492
	-83.2876
	-79.2689
	-75.1944
	-71.0659
	-66.8851
	-62.6534
	-58.3727
	-54.0446
	-49.6706
	-45.2526
	-40.7921
	-36.2906
	-31.7499
	-27.1715
	-27.1715
	-27.42
	-27.5023
	-27.4118
	-27.1431
	-26.692
	-26.0561
	-25.2344
	-24.2278
	-23.0387
	-21.6709
	-20.1301
	-18.4234
	-16.559
	-14.5464
	-12.3962
	-10.1197
	-7.72915
	-5.23698
	-2.65621
	0
tsave	20
	-101.666
	-97.9785
	-94.2314
	-90.4258
	-86.5632
	-82.6449
	-78.6725
	-74.6473
	-70.571
	-66.4449
	-62.2707
	-58.0498
	-53.7838
	-49.4741
	-45.1223
	-40.73
	-36.2984
	-31.8293
	-27.3238
	-22.7836
	-18.21
	-18.21
	-18.5042
	-18.6795
	-18.7307
	-18.6533
	-18.4437
	-18.0991
	-17.6177
	-16.9988
	-16.2427
	-15.3508
	-14.3256
	-13.1707
	-11.8907
	-10.4911
	-8.97855
	-7.36023
	-5.64424
	-3.83928
	-1.95462
	0
tsave	30
	-90.7087
	-86.8969
	-83.0333
	-79.119
	-75.1556
	-71.1442
	-67.0863
	-62.9832
	-58.8364
	-54.6472
	-50.4169
	-46.147
	-41.8388
	-37.4936
	-33.1127
	-28.6974
	-24.2491
	-19.7689
	-15.2581
	-10.718
	-6.14955
	-6.14955
	-6.49381
	-6.77621
	-6.99388
	-7.14424
	-7.22508
	-7.23455
	-7.17123
	-7.03414
	-6.82282
	-6.53728
	-6.17808
	-5.74635
	-5.24376
	-4.67254
	-4.0355
	-3.33602
	-2.57802
	-1.76594
-0.904775
	0

## Sheet: Sheet1
tsave	0		depth														0.01		1	100
	-46.0476		100														0.01		1	99
	-46.0472		99														0.01		1	98
	-46.0467		98														0.015		1.5	96.5
	-46.0462		96.5														0.015		1.5	95
	-46.0453		95														0.02		2	93
	-46.0443		93														0.03		3	90
	-46.0426		90														0.04		4	86
	-46.0394		86														0.07		7	79
	-46.0334		79														0.07		7	72
	-46.0149		72														0.07		7	65
	-45.9777		65														0.07		7	58
	-45.9032		58														0.07		7	51
	-45.7549		51														0.07		7	44
	-45.4627		44														0.07		7	37
	-44.899		37														0.07		7	30
	-43.8521		30														0.07		7	23
	-42.0275		23														0.07		7	16
	-39.1318		16														0.04		4	12
	-35.0353		12														0.03		3	9
	-32.1958		9														0.02		2	7
	-29.8661		7														0.015		1.5	5.5
	-28.232		5.5														0.015		1.5	4
	-26.9692		4														0.01		1	3
	-25.678		3														0.01		1	2
	-24.8029		2														0.01		1	1
	-23.9172		1														0.01		1	0
	-23.0218		0														0.01		1	-1
	-23.0218		0														0.01		1	-2
	-23.0213		-1														0.015		1.5	-3.5
	-23.0209		-2														0.015		1.5	-5
	-23.0203		-3.5														0.02		2	-7
	-23.0194		-5														0.03		3	-10
	-23.0184		-7														0.04		4	-14
	-23.0168		-10														0.07		7	-21
	-23.0136		-14														0.07		7	-28
	-23.0076		-21														0.07		7	-35
	-22.989		-28														0.07		7	-42
	-22.9519		-35														0.07		7	-49
	-22.8774		-42														0.07		7	-56
	-22.7292		-49														0.07		7	-63
	-22.4371		-56														0.07		7	-70
	-21.8737		-63														0.07		7	-77
	-20.8272		-70														0.07		7	-84
	-19.0032		-77														0.04		4	-88
	-16.1082		-84														0.03		3	-91
	-12.0125		-88														0.02		2	-93
	-9.17331		-91														0.015		1.5	-94.5
	-6.84393		-93														0.015		1.5	-96
	-5.20993		-94.5														0.01		1	-97
	-3.94725		-96														0.01		1	-98
	-2.65612		-97														0.01		1	-99
	-1.78101		-98																	-100
	-0.895378		-99
	0		-100
tsave	1
	-24.9532
	-25.0449
	-25.1423
	-25.2457
	-25.4104
	-25.5893
	-25.8487
	-26.2829
	-26.9549
	-28.3963
	-30.1874
	-32.2876
	-34.5967
	-36.9315
	-38.9972
	-40.3719
	-40.5508
	-39.1064
	-35.917
	-33.1597
	-30.7732
	-29.0369
	-27.6789
	-26.3047
	-25.3601
	-24.4117
	-23.4598
	-23.4598
	-23.3802
	-23.3091
	-23.2475
	-23.1703
	-23.1139
	-23.063
	-23.0228
	-23.0041
	-22.9877
	-22.9524
	-22.8792
	-22.7328
	-22.4442
	-21.8872
	-20.8522
	-19.0505
	-16.2131
	-12.2883
	-9.43434
	-7.08144
	-5.39856
	-4.08788
	-2.76081
	-1.84681
	-0.926619
	0
tsave	2
	-24.3358
	-24.3618
	-24.3895
	-24.4189
	-24.4659
	-24.5172
	-24.592
	-24.7176
	-24.914
	-25.338
	-25.8958
	-26.6032
	-27.468
	-28.485
	-29.6224
	-30.7956
	-31.81
	-32.2658
	-31.4987
	-30.0259
	-28.3883
	-27.0281
	-25.886
	-24.6748
	-23.8105
	-22.9225
	-22.0129
	-22.0129
	-22.3227
	-22.5642
	-22.7459
	-22.9411
	-23.0526
	-23.1204
	-23.1283
	-23.0808
	-23.0081
	-22.9566
	-22.8812
	-22.7363
	-22.4512
	-21.9012
	-20.8811
	-19.113
	-16.3418
	-12.4873
	-9.6166
	-7.22568
	-5.50794
	-4.16878
	-2.81358
	-1.88094
	-0.943089
	0
tsave	5
	-24.0922
	-24.0934
	-24.0948
	-24.0963
	-24.0986
	-24.1011
	-24.1048
	-24.1111
	-24.1209
	-24.1423
	-24.1709
	-24.2067
	-24.2468
	-24.2806
	-24.2808
	-24.1825
	-23.8444
	-22.9911
	-21.1833
	-19.3402
	-17.553
	-16.1497
	-14.9998
	-13.7963
	-12.9459
	-12.0764
	-11.1891
	-11.1891
	-11.7115
	-12.2394
	-12.77
	-13.5762
	-14.3746
	-15.426
	-16.9509
	-18.7535
	-21.0861
	-22.2579
	-22.672
	-22.6919
	-22.4627
	-21.9491
	-20.9855
	-19.3128
	-16.6545
	-12.8431
	-9.90997
	-7.44442
	-5.66893
	-4.28581
	-2.88885
	-1.92932
	-0.966327
	0
tsave	10
	-24.0781
	-24.078
	-24.0778
	-24.0777
	-24.0774
	-24.0771
	-24.0765
	-24.0756
	-24.0738
	-24.0688
	-24.058
	-24.0347
	-23.9851
	-23.8801
	-23.6605
	-23.2108
	-22.3217
	-20.6706
	-17.8885
	-15.4789
	-13.3305
	-11.7295
	-10.4577
	-9.15523
	-8.25126
	-7.33761
	-6.41506
	-6.41506
	-6.60401
	-6.8015
	-7.00751
	-7.33115
	-7.67354
	-8.1578
	-8.94219
	-10.0909
	-12.372
	-14.7925
	-17.1074
	-19.0425
	-20.3651
	-20.9287
	-20.6341
	-19.3437
	-16.8665
	-13.0771
	-10.0926
	-7.57541
	-5.76335
	-4.35359
	-2.932
	-1.95692
	-0.979532
	0
tsave	15
	-24.0774
	-24.0772
	-24.077
	-24.0767
	-24.0763
	-24.0758
	-24.075
	-24.0736
	-24.0711
	-24.0641
	-24.0497
	-24.0195
	-23.9567
	-23.8268
	-23.5609
	-23.0276
	-21.9986
	-20.1421
	-17.1157
	-14.5658
	-12.328
	-10.6771
	-9.37349
	-8.04446
	-7.12529
	-6.19852
	-5.26475
	-5.26475
	-5.35014
	-5.44029
	-5.53533
	-5.68587
	-5.84789
	-6.08063
	-6.46537
	-7.05021
	-8.27124
	-9.7405
	-11.415
	-13.2113
	-14.9904
	-16.5344
	-17.5171
	-17.4948
	-15.9974
	-12.7754
	-9.95642
	-7.50769
	-5.72351
	-4.32827
	-2.91737
	-1.94795
	-0.97535
	0
tsave	20
	-24.0772
	-24.0769
	-24.0767
	-24.0764
	-24.076
	-24.0754
	-24.0746
	-24.073
	-24.0703
	-24.0627
	-24.0471
	-24.0145
	-23.9472
	-23.8083
	-23.5255
	-22.9613
	-21.8803
	-19.9478
	-16.832
	-14.2307
	-11.9599
	-10.2903
	-8.97475
	-7.63552
	-6.71041
	-5.77842
	-4.84011
	-4.84011
	-4.88387
	-4.9303
	-4.97951
	-5.05781
	-5.14278
	-5.26575
	-5.47088
	-5.78763
	-6.46003
	-7.3098
	-8.33829
	-9.52952
	-10.8391
	-12.172
	-13.3381
	-13.9819
	-13.5427
	-11.4291
	-9.14326
	-7.00315
	-5.38456
	-4.09411
	-2.77251
	-1.85632
	-0.931762
	0
tsave	30
	-24.077
	-24.0768
	-24.0765
	-24.0762
	-24.0758
	-24.0752
	-24.0743
	-24.0727
	-24.0697
	-24.0618
	-24.0454
	-24.0113
	-23.941
	-23.7962
	-23.502
	-22.9171
	-21.8012
	-19.8176
	-16.6415
	-14.0054
	-11.7121
	-10.0297
	-8.70577
	-7.35939
	-6.43007
	-5.49435
	-4.55274
	-4.55274
	-4.56643
	-4.58103
	-4.59659
	-4.62147
	-4.64869
	-4.68838
	-4.75525
	-4.86016
	-5.08687
	-5.388
	-5.7732
	-6.24742
	-6.80598
	-7.42464
	-8.03916
	-8.50603
	-8.54251
	-7.69072
	-6.45658
	-5.13409
	-4.04557
	-3.13078
	-2.15565
	-1.45872
	-0.73961
	0
